# Supplementary material for: Expanding the CRISPR Toolbox for Engineering Lycopene Biosynthesis in Corynebacterium glutamicum
Source: MDPI journal article supplement (doi:10.3390/microorganisms12040803), 2024-04-16
Supplement: s1 [file s1]

## Supplementary files

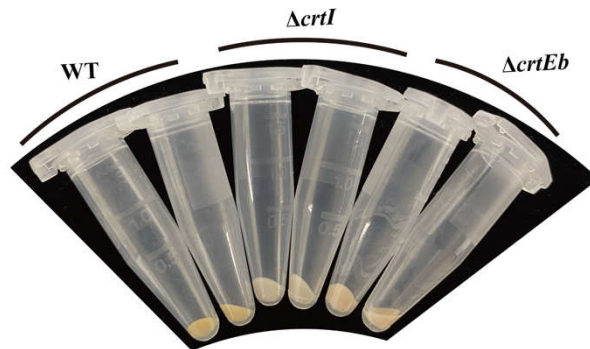

**Figure S1** Colour comparison of the WT strain,  $\Delta crtI$  strain, and  $\Delta crtEb$  strain. From left to right strains are WT (*C. glutamicum* ATCC 13032, light yellow),  $\Delta crtI$  (*C. glutamicum* ATCC 13032- $\Delta crtI$ , white), and  $\Delta crtEb$  (*C. glutamicum* ATCC 13032- $\Delta crtEb$ , light pink).

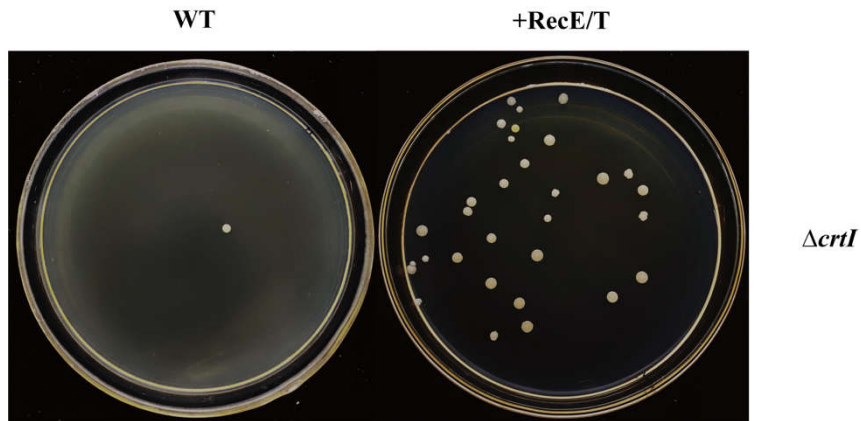

**Figure S2** Effect of introduction of *recE/T* on the number of transformants. Both sides of the plate were introduced CRISPR/MAD7 system for  $\Delta crtI$  in *C. glutamicum* ATCC 13032. The right plate was introduced *RecE/T* to promote homologous recombination, while the left did not.

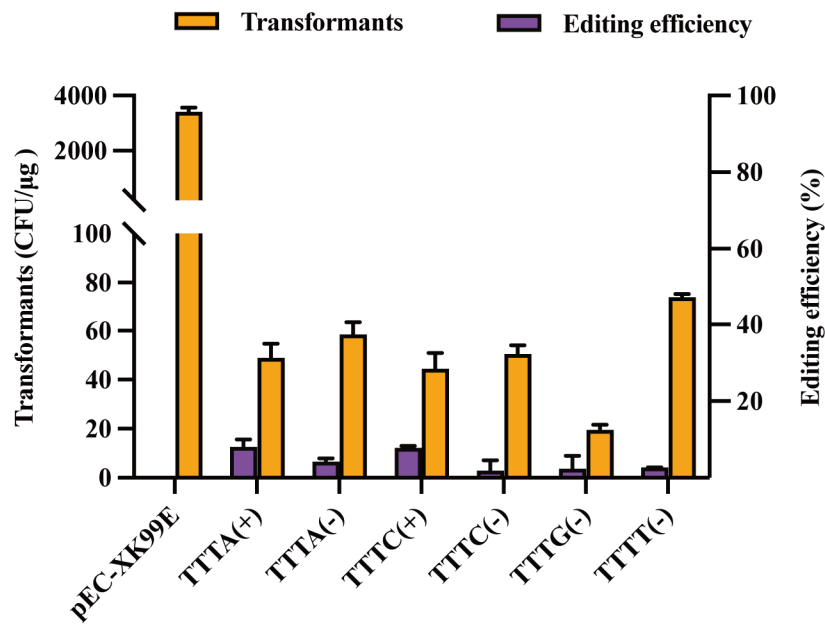

**Figure S3** Transformants and editing efficiency of CRISPR/MAD7 using different PAM sequences. The effect of different PAM sequences on the transformants and the editing efficiency of  $\Delta crtI$  by CRISPR/MAD7 system based on pEC-XK99E plasmid and *P<sub>trc</sub>*-MAD7 in *C. glutamicum* ATCC 13032.

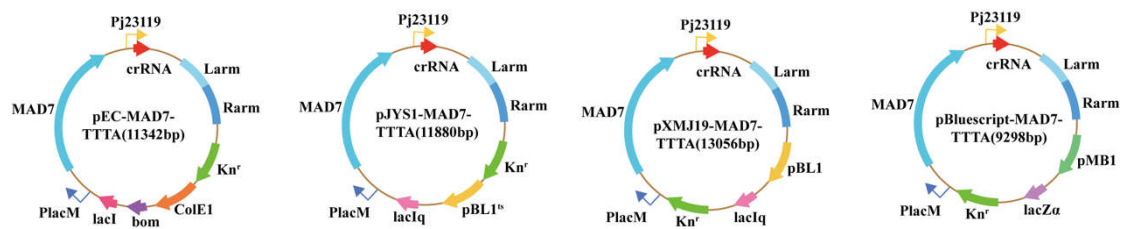

**Figure S4** Schematic representation of the different plasmids carrying CRISPR/MAD7 system. All in one CRISPR/MAD7 system constructed using different plasmids, from left to right are based on pEC-XK99E, pJYS1Peftu, pXMJ19 and pBluescript respectively.

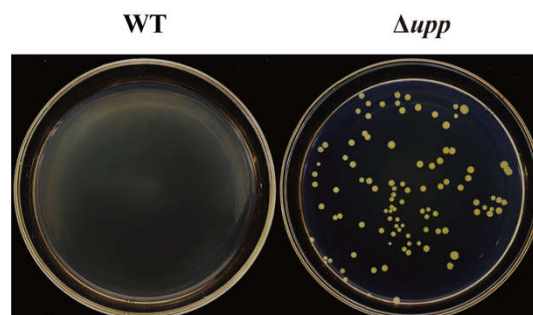

**Figure S5** Comparison of the transformants number with knockout of the *upp* gene. The WT (*C. glutamicum* ATCC 13032) and  $\Delta upp$  (*C. glutamicum* ATCC 13032- $\Delta upp$ ) strain on the plates. Both the left and right plate is supplemented with 100  $\mu$ M 5-fluorouracil. Under normal circumstances, the colonies on the right plate will all be positive.

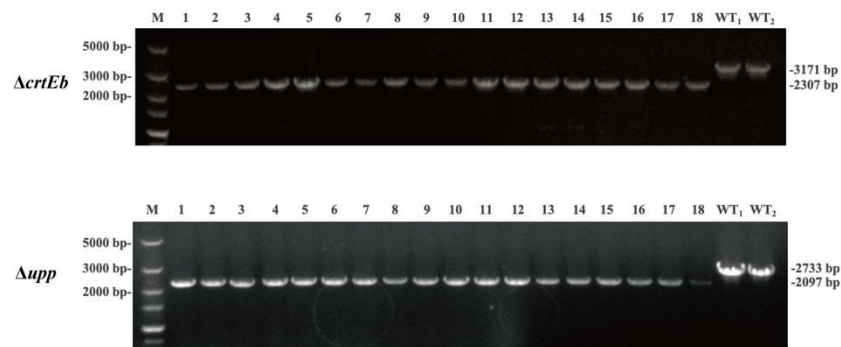

**Figure S6** PCR validation of *crtEb* and *upp* gene deletion. From top to bottom, utilizing colony PCR for identification of *crtEb* and *upp* deletion in the genome of *C. glutamicum* ATCC 13032.

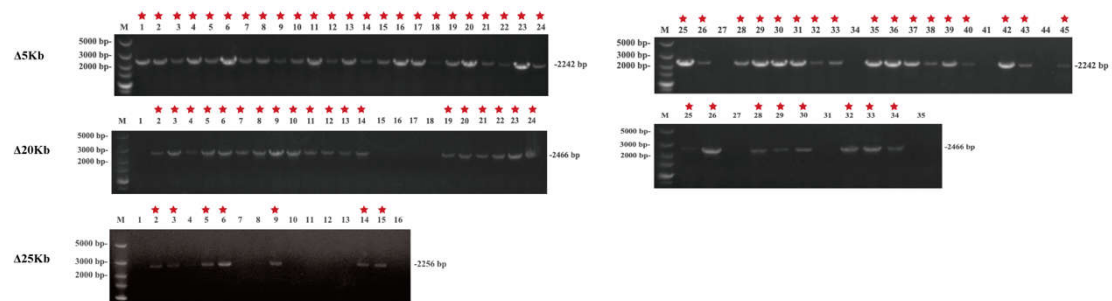

**Figure S7** PCR validation of large DNA fragments deletion. From top to bottom, using colony PCR for identification of 5 kb, 20 kb, 25 kb DNA fragments deletion in the genome of *C. glutamicum* ATCC 13032.

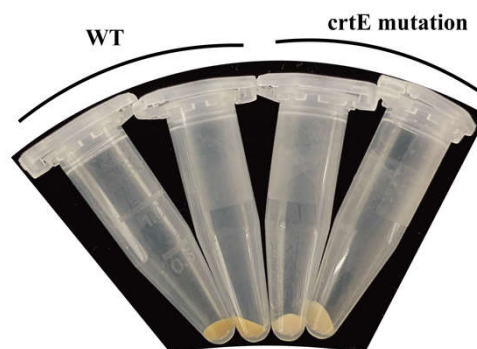

**Figure S8** Colour comparison of the WT strain and *crtE* mutation strain. From left to right strains are WT (*C. glutamicum* ATCC 13032, light yellow), *crtE* mutation (*C. glutamicum* ATCC 13032-*crtE* mutation, white).

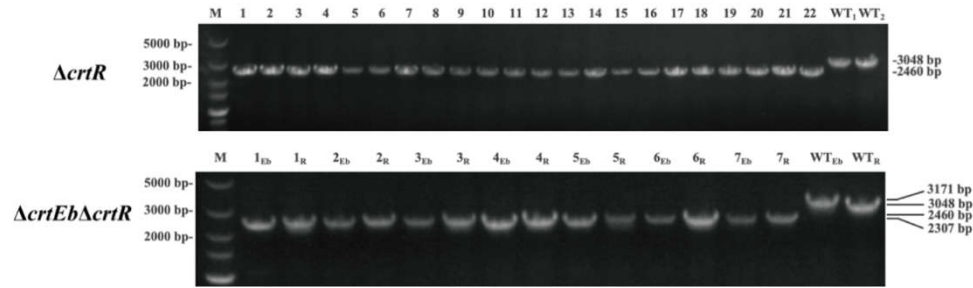

**Figure S9** PCR validation of *crtR* gene and double gene deletion. From top to bottom, using colony PCR for identification of  $\Delta crtR$ ,  $\Delta crtEb\Delta crtR$  in *C. glutamicum* ATCC 13032.

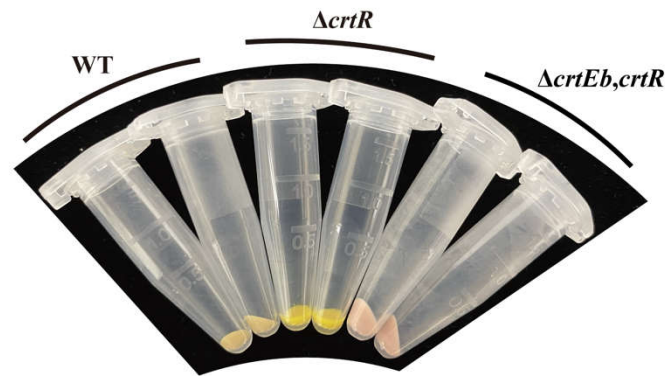

**Figure S10** Colour comparison of the WT strain,  $\Delta crtR$  strain, and  $\Delta crtEb\Delta crtR$  strain. From left to right strains are WT (*C. glutamicum* ATCC 13032, light yellow),  $\Delta crtR$  (*C. glutamicum* ATCC 13032- $\Delta crtR$ , dark yellow),  $\Delta crtEb\Delta crtR$  (*C. glutamicum* ATCC 13032- $\Delta crtEb\Delta crtR$ , pink).

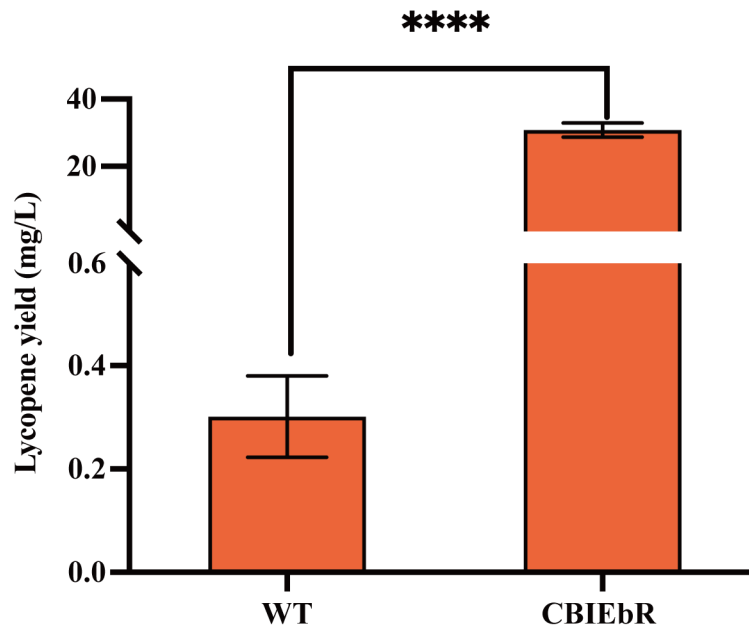

**Figure S11** Lycopene production of WT strain and CBIEbR strain. Lycopene yield of WT strain and CBIEbR strain using CGXII medium (40 g/L glucose was added). Data are analyzed using two-tailed t-test, \* $P < 0.05$ , \*\* $P < 0.01$ , \*\*\* $P < 0.001$ , \*\*\*\* $P < 0.0001$ .

**Table S1** Strains and plasmids used in this study.

| Strains                         | properties                                                                                                                                                                                                                                    | Source                  |
|---------------------------------|-----------------------------------------------------------------------------------------------------------------------------------------------------------------------------------------------------------------------------------------------|-------------------------|
| <i>C. glutamicum</i> ATCC 13032 | wild type                                                                                                                                                                                                                                     | Buy from ATCC           |
| <i>C. glutamicum</i> WT-RecE/T  | ATCC 13032 contains pEC-RecE/T plasmid                                                                                                                                                                                                        | This study              |
| <i>C. glutamicum</i> WT-RecT    | ATCC 13032 contains pEC-recT plasmid                                                                                                                                                                                                          | This study              |
| <i>E. coli</i> Top10F'          | F' {lacIq Tn10 (Tet <sup>R</sup> )} <i>mcrA</i> Δ ( <i>mrr-hsdRMS-mcrBC</i> ) Φ80 <i>lacZ</i> Δ <i>M15</i> Δ <i>lacX74</i> <i>recA1</i> <i>araD139</i> Δ ( <i>ara-leu</i> ) 7697 <i>galU</i> <i>galK</i> <i>rpsL</i> <i>endA1</i> <i>nupG</i> | Buy from ATCC           |
| <b>Plasmids</b>                 |                                                                                                                                                                                                                                               |                         |
| pEC-XK99E                       | Kn <sup>r</sup> , pMB1 <i>ori</i> , <i>bom</i> , <i>lacI</i> , P <sub>trc</sub> , <i>rrnB</i> T1, <i>rrnB</i> T2                                                                                                                              | Stock in the laboratory |
| pZ9                             | Kn <sup>r</sup> , p15A <i>ori</i> , <i>rep</i> , P <sub>tac</sub> , <i>rrnB</i> T1, <i>rrnB</i> T2                                                                                                                                            | Stock in the laboratory |
| pJYS1Peftu                      | Kn <sup>r</sup> , pBL1 <sup>ts</sup> <i>ori</i> , pSC101 <i>ori</i> , <i>lacIq</i> , P <sub>lacM-Fn</sub> Cpf1, Peftu- <i>RecT</i>                                                                                                            | Addgene                 |
| pXMJ19                          | Cm <sup>r</sup> , P <sub>lacIq</sub> , <i>lacIq</i> , pBL1 <i>ori</i> , pUC <i>ori</i> , <i>rrnB</i> term                                                                                                                                     | Addgene                 |
| pBluescript                     | Amp <sup>r</sup> , Cole1 <i>ori</i> , f1 <i>ori</i> , <i>lacZα</i>                                                                                                                                                                            | Addgene                 |
| pEC-RecE/T                      | Cm <sup>r</sup> , pEC-RecE/T derivative for IPTG induced expression of RecE and RecT from Rac prophage from <i>E. coli</i>                                                                                                                    | Stock in the laboratory |
| pEC-recT                        | Cm <sup>r</sup> pEC-recT constructed by removing RecE from pEC-RecE/T                                                                                                                                                                         | This study              |
| pEC-MAD7                        | Kn <sup>r</sup> , pEC-XK99E carrying P <sub>trc</sub> -MAD7                                                                                                                                                                                   | This study              |
| pEC-MAD7-crRNA-TTTA (+)         | Kn <sup>r</sup> , pEC-XK99E carrying P <sub>trc</sub> -MAD7 and Pj23119-crRNA to target <i>crtI</i> gene, but without carrying homologous arm                                                                                                 | This study              |
| pEC-MAD7-TTTA (+)               | Kn <sup>r</sup> , pEC-XK99E carrying P <sub>trc</sub> -MAD7, Pj23119-crRNA, and homologous arm to target <i>crtI</i> gene                                                                                                                     | This study              |
| pEC-MAD7-TTTA (-)               | Kn <sup>r</sup> , pEC-XK99E carrying P <sub>trc</sub> -MAD7, Pj23119-crRNA, and homologous arm to target <i>crtI</i> gene                                                                                                                     | This study              |
| pEC-MAD7-TTTC (+)               | Kn <sup>r</sup> , pEC-XK99E carrying P <sub>trc</sub> -MAD7, Pj23119-crRNA, and homologous arm to target <i>crtI</i> gene                                                                                                                     | This study              |

|                           |                                                                                                                 |            |
|---------------------------|-----------------------------------------------------------------------------------------------------------------|------------|
| pEC-MAD7-TTTC (-)         | Kn <sup>r</sup> , pEC-XK99E carrying Ptrc-MAD7, Pj23119-crRNA, and homologous arm to target <i>crtI</i> gene    | This study |
| pEC-MAD7-TTTG (-)         | Kn <sup>r</sup> , pEC-XK99E carrying Ptrc-MAD7, Pj23119-crRNA, and homologous arm to target <i>crtI</i> gene    | This study |
| pEC-MAD7-TTTT (-)         | Kn <sup>r</sup> , pEC-XK99E carrying Ptrc-MAD7, Pj23119-crRNA, and homologous arm to target <i>crtI</i> gene    | This study |
| pEC-Ptac-MAD7-TTTA (+)    | Kn <sup>r</sup> , pEC-XK99E carrying Ptac-MAD7, Pj23119-crRNA, and homologous arm to target <i>crtI</i> gene    | This study |
| pEC-Ptuf-MAD7-TTTA (+)    | Kn <sup>r</sup> , pEC-XK99E carrying Ptuf-MAD7, Pj23119-crRNA, and homologous arm to target <i>crtI</i> gene    | This study |
| pEC-PlacM-MAD7-TTTA (+)   | Kn <sup>r</sup> , pEC-XK99E carrying PlacM-MAD7, Pj23119-crRNA, and homologous arm to target <i>crtI</i> gene   | This study |
| pXMJ19-MAD7-TTTA (+)      | Kn <sup>r</sup> , pXMJ19 carrying PlacM-MAD7, Pj23119-crRNA, and homologous arm to target <i>crtI</i> gene      | This study |
| pBluescript-MAD7-TTTA (+) | Kn <sup>r</sup> , pBluescript carrying PlacM-MAD7, Pj23119-crRNA, and homologous arm to target <i>crtI</i> gene | This study |
| pJYS1-MAD7-TTTA (+)       | Kn <sup>r</sup> , pJYS1Peftu carrying PlacM-MAD7, Pj23119-crRNA, and homologous arm to target <i>crtI</i> gene  | This study |
| pJYS1-MAD7-TTTA (-)       | Kn <sup>r</sup> , pJYS1Peftu carrying PlacM-MAD7, Pj23119-crRNA, and homologous arm to target <i>crtI</i> gene  | This study |
| pJYS1-MAD7-TTTC (+)       | Kn <sup>r</sup> , pJYS1Peftu carrying PlacM-MAD7, Pj23119-crRNA, and homologous arm to target <i>crtI</i> gene  | This study |
| pJYS1-MAD7-TTTC (-)       | Kn <sup>r</sup> , pJYS1Peftu carrying PlacM-MAD7, Pj23119-crRNA, and homologous arm to target <i>crtI</i> gene  | This study |
| pJYS1-MAD7-TTTG (-)       | Kn <sup>r</sup> , pJYS1Peftu carrying PlacM-MAD7, Pj23119-crRNA, and homologous arm to target <i>crtI</i> gene  | This study |
| pJYS1-MAD7-TTTT (-)       | Kn <sup>r</sup> , pJYS1Peftu carrying PlacM-MAD7, Pj23119-crRNA, and homologous arm to target <i>crtI</i> gene  | This study |

|                                   |                                                                                                                 |            |
|-----------------------------------|-----------------------------------------------------------------------------------------------------------------|------------|
| pJYS1-MAD7-CTTT                   | Kn <sup>r</sup> , pJYS1Peftu carrying PlacM-MAD7, Pj23119-crRNA, and homologous arm to target <i>crtI</i> gene  | This study |
| pJYS1-MAD7-CTTG                   | Kn <sup>r</sup> , pJYS1Peftu carrying PlacM-MAD7, Pj23119-crRNA, and homologous arm to target <i>crtI</i> gene  | This study |
| pJYS1-MAD7-CTTA                   | Kn <sup>r</sup> , pJYS1Peftu carrying PlacM-MAD7, Pj23119-crRNA, and homologous arm to target <i>crtI</i> gene  | This study |
| pJYS1-MAD7-CTTC                   | Kn <sup>r</sup> , pJYS1Peftu carrying PlacM-MAD7, Pj23119-crRNA, and homologous arm to target <i>crtI</i> gene  | This study |
| pJYS1-MAD7-TTTC-<br><i>ΔcrtEb</i> | Kn <sup>r</sup> , pJYS1Peftu carrying PlacM-MAD7, Pj23119-crRNA, and homologous arm to target <i>crtEb</i> gene | This study |
| pJYS1-MAD7-TTTG-<br><i>ΔcrtEb</i> | Kn <sup>r</sup> , pJYS1Peftu carrying PlacM-MAD7, Pj23119-crRNA, and homologous arm to target <i>crtEb</i> gene | This study |
| pJYS1-MAD7-CTTT-<br><i>ΔcrtEb</i> | Kn <sup>r</sup> , pJYS1Peftu carrying PlacM-MAD7, Pj23119-crRNA, and homologous arm to target <i>crtEb</i> gene | This study |
| pJYS1-MAD7-CTTG-<br><i>ΔcrtEb</i> | Kn <sup>r</sup> , pJYS1Peftu carrying PlacM-MAD7, Pj23119-crRNA, and homologous arm to target <i>crtEb</i> gene | This study |
| pJYS1-MAD7-CTTA-<br><i>ΔcrtEb</i> | Kn <sup>r</sup> , pJYS1Peftu carrying PlacM-MAD7, Pj23119-crRNA, and homologous arm to target <i>crtEb</i> gene | This study |
| pJYS1-MAD7-CTTC-<br><i>ΔcrtEb</i> | Kn <sup>r</sup> , pJYS1Peftu carrying PlacM-MAD7, Pj23119-crRNA, and homologous arm to target <i>crtEb</i> gene | This study |
| pJYS1-MAD7-TTTC- <i>Δupp</i>      | Kn <sup>r</sup> , pJYS1Peftu carrying PlacM-MAD7, Pj23119-crRNA, and homologous arm to target <i>upp</i> gene   | This study |
| pJYS1-MAD7-TTTG- <i>Δupp</i>      | Kn <sup>r</sup> , pJYS1Peftu carrying PlacM-MAD7, Pj23119-crRNA, and homologous arm to target <i>upp</i> gene   | This study |
| pJYS1-MAD7-CTTT- <i>Δupp</i>      | Kn <sup>r</sup> , pJYS1Peftu carrying PlacM-MAD7, Pj23119-crRNA, and homologous arm to target <i>upp</i> gene   | This study |
| pJYS1-MAD7-CTTG- <i>Δupp</i>      | Kn <sup>r</sup> , pJYS1Peftu carrying PlacM-MAD7, Pj23119-crRNA, and homologous arm to target <i>upp</i> gene   | This study |

|                                            |                                                                                                                                       |            |
|--------------------------------------------|---------------------------------------------------------------------------------------------------------------------------------------|------------|
| pJYS1-MAD7-CTTA- $\Delta upp$              | Kn <sup>r</sup> , pJYS1Peftu carrying PlacM-MAD7, Pj23119-crRNA, and homologous arm to target <i>upp</i> gene                         | This study |
| pJYS1-MAD7-CTTC- $\Delta upp$              | Kn <sup>r</sup> , pJYS1Peftu carrying PlacM-MAD7, Pj23119-crRNA, and homologous arm to target <i>upp</i> gene                         | This study |
| pJYS1-MAD7-TTTC- $\Delta 5$ kb             | Kn <sup>r</sup> , pJYS1Peftu carrying PlacM-MAD7, Pj23119-crRNA, and homologous arm to target 5 kb gene                               | This study |
| pJYS1-MAD7-TTTC- $\Delta 20$ kb            | Kn <sup>r</sup> , pJYS1Peftu carrying PlacM-MAD7, Pj23119-crRNA, and homologous arm to target 20 kb gene                              | This study |
| pJYS1-Cpf1-TTTC- $\Delta 20$ kb            | Kn <sup>r</sup> , pJYS1Peftu carrying PlacM-Cpf1, Pj23119-crRNA, and homologous arm to target 20 kb gene                              | This study |
| pJYS1-MAD7-TTTC- $\Delta 25$ kb            | Kn <sup>r</sup> , pJYS1Peftu carrying PlacM-MAD7, Pj23119-crRNA, and homologous arm to target 25 kb gene                              | This study |
| pJYS1-MAD7-TTTC- <i>crtE</i>               | Kn <sup>r</sup> , pJYS1Peftu carrying PlacM-MAD7, Pj23119-crRNA, and homologous arm to target <i>crtE</i> gene                        | This study |
| pJYS1-MAD7-TTTC- $\Delta crtR$             | Kn <sup>r</sup> , pJYS1Peftu carrying PlacM-MAD7, Pj23119-crRNA, and homologous arm to target <i>crtR</i> gene                        | This study |
| pJYS1-MAD7-TTTC- $\Delta crtEb\Delta crtR$ | Kn <sup>r</sup> , pJYS1Peftu carrying PlacM-MAD7, Pj23119-crRNA array, and homologous arm to target <i>crtEb</i> and <i>crtR</i> gene | This study |
| pZ9- <i>crtE-crtB-crtI</i>                 | Kn <sup>r</sup> , pZ9 carrying one copy of the <i>crtE-crtB-crtI</i> gene                                                             | This study |
| pZ9- <i>cg0722-crtB-crtI</i>               | Kn <sup>r</sup> , pZ9 carrying one copy of the <i>cg0722-crtB-crtI</i>                                                                | This study |
| pZ9- <i>crtE-cg0722-crtB-crtI</i>          | Kn <sup>r</sup> , pZ9 carrying one copy of the <i>crtE-cg0722-crtB-crtI</i>                                                           | This study |
| pZ9- <i>idsA-idi-crtB-crtI</i>             | Kn <sup>r</sup> , pZ9 carrying one copy of the <i>idsA-idi-crtB-crtI</i>                                                              | This study |

**Table S2** Primers used in this study.

| Primers | DNA Sequence (5'to3')                      | Reference                              |
|---------|--------------------------------------------|----------------------------------------|
| P1      | GAGAGAAGATTTTCAGCCTGATACAGAT               | To amplify pEC-XK99E backbone fragment |
| P2      | TCTGTTTCCTGTGTGAAATTGTTATCCGCT<br>CACAATTC |                                        |

|     |                                                                     |                                          |
|-----|---------------------------------------------------------------------|------------------------------------------|
| P3  | TTTCACACAGGAAACAGAATATGAACAA<br>CGGC                                | To clone pEC-MAD7                        |
| P4  | CAGGCTGAAAATCTTCTCTCT                                               |                                          |
| P5  | ATTAATGCAGCTGGCACGACA                                               | To identify pEC-MAD7                     |
| P6  | TAGGTGGAGGTATCGGAGAAA                                               |                                          |
| P7  | TCCGATACCTCCACCTACGAA                                               |                                          |
| P8  | CCGCTCGAGGGATGAATGTCAGCTACTGG<br>G                                  | To amplify crRNA-TTTA (+)<br>fragment    |
| P9  | TCCCCGCGGCGATCCTCATCCTGTCTCTTG                                      |                                          |
| P10 | CGAAGCGGCACCTTTAGTGCAT                                              | To identify pEC-MAD7-<br>crRNA-TTTA (+)  |
| P11 | AAGGCTCAGTCGAAAGACTGGGCCTTTTCG<br>TTTTATGATGTTATACGGGATAAGAAA       | To amplify $\Delta crtI$ homology<br>arm |
| P12 | AGCGCTCAAATAAAAACGAAAGGCTCAGT<br>CG                                 |                                          |
| P13 | ATCGATGATAGGGATCAAATTCACGAAT<br>TCTTTCTGTAGATGCT                    |                                          |
| P14 | ATTTTGATCCCTATCATCGAT                                               |                                          |
| P15 | GGTCGCGATGCCTGCTTTGTTCTACGACAT<br>C                                 |                                          |
| P16 | GTTTTTAAATCGACGGCGGCATCGAGTGC<br>GTC                                | To clone pEC-MAD7-TTTA<br>(+)            |
| P17 | CGTTTTATTTGAGCGCTAGTGCTAAAAGTG<br>CAGAAGTG                          |                                          |
| P18 | CCCAGGAGGATTAATACCGCTAGCGCTCA<br>AATAAAAACGAAAGGCTCAGTCG            | To clone pEC-MAD7-TTTA (-)               |
| P19 | GGTATTAATCCTCCTGGGCGATCTACAAG<br>AGTAGAAATTAAAAAGGTCTTTTGACACT      |                                          |
| P20 | TTTAATTTCTACTCTTG TAGATGATGGGAT<br>ACCGGACCTTCTTCTAGCGCTCAAATAA     | To clone pEC-MAD7-TTTC<br>(+)            |
| P21 | AGCGCTAGAAGAAGGTCCGGTATCCCATC<br>ATCTACAAGAGTAGAAATTAAAAAGGTCT<br>T |                                          |
| P22 | AGCGCTAGGTATCCAGCAGGTGCAACGCC<br>ATCTACAAGAGTAGAAATTAAAAAGGTCT<br>T | To clone pEC-MAD7-TTTC (-)               |
| P23 | TTTAATTTCTACTCTTG TAGATGGCGTTGC<br>ACCTGCTGGATACCTAGCGCTCAAATAA     |                                          |

|     |                                                                         |                                     |
|-----|-------------------------------------------------------------------------|-------------------------------------|
| P24 | TTTAATTTCTACTCTTGTAGATCACTTTTCT<br>GTTGTGAAGCAACTAGCGCTCAAATAA          | To clone pEC-MAD7-TTTG (-)          |
| P25 | AGCGCTAGTTGCTTCACAACAGAAAAGTG<br>ATCTACAAGAGTAGAAATTA AAAAAGGTCT<br>T   |                                     |
| P26 | TTTAATTTCTACTCTTGTAGATAGGCGGCA<br>ATGGTTCGGGCAGCTAGCGCTCAAATAA          | To clone pEC-MAD7-TTTT (-)          |
| P27 | AGCGCTAGCTGCCCCGAACCAT TGCCGCCT<br>ATCTACAAGAGTAGAAATTA AAAAAGGTCT<br>T |                                     |
| P28 | GCTAGCTCAGTCCTAGGTATAAT                                                 | To identify pEC-MAD7-TTTN (+)       |
| P29 | CATCGGCTCGTATAATGATGAACAACGGC<br>ACCAACAAC                              | To clone pEC-Ptac-MAD7-TTTA (+)     |
| P30 | CATTATACGAGCCGATGATTAATTGTCAA<br>CAGCTCATTT CAGAATATTTGCCAG             |                                     |
| P31 | GATATCCTTCAGGATCTGGCG                                                   | To identify pEC-Ptac-MAD7-TTTA (+)  |
| P32 | GTCCAGGAGGACATACAATGAACAACGG<br>CACCAACAAC                              | To clone pEC-Ptuf-MAD7-TTTA (+)     |
| P33 | TGTATGTCCTCCTGGACTTCGCAGCTCATT<br>TCAGAATATTTGCCAG                      |                                     |
| P34 | TCTTTGATGATGCCGTTCTTCACGATG                                             | To identify pEC-Ptuf-MAD7-TTTA (+)  |
| P35 | GTGTGGTACCATGTGTGGAATTGAAAGG<br>ACTTGAACGATGAACAACGGCACCAACA<br>AC      | To clone pEC-PlacM-MAD7-TTTA (+)    |
| P36 | ACACATGGTACCACACGATGATTAATTGT<br>AAACAGCCAGCTCATTT CAGAATATTTGC<br>C    |                                     |
| P37 | TCCAATCGATATCATCGATGGAG                                                 | To identify pEC-PlacM-MAD7-TTTA (+) |
| P38 | GGTGCCGTTGTTTCATCGTTCAAGTCCTTTC<br>CAATT                                | To clone pJYS1-MAD7-TTTA (+)        |
| P39 | CTAGGACTGAGCTAGCTGTCAACAGCCTG<br>GCGGTGTAATGCA                          |                                     |
| P40 | GCTAGCTCAGTCCTAGGTATAAT                                                 |                                     |
| P41 | ATGAACAACGGCACCAACAA                                                    |                                     |
| P42 | GCAAAAACAACGAACCACACT                                                   | To identify pJYS1-MAD7-TTTA (+)     |
| P43 | GACTGAGCTAGCTGTCAACGAAATGACCG<br>ACCAAGCGAC                             | To clone pXMJ19-MAD7-TTTA (+)       |

|     |                                                                     |                                                                          |
|-----|---------------------------------------------------------------------|--------------------------------------------------------------------------|
| P44 | TTTCTCTTTGCGCTTGCGGCCAGGGTGGTT<br>TTTCTTTTCACCAGT                   |                                                                          |
| P45 | CGCAAGCGCAAAGAGAAAGCAG                                              |                                                                          |
| P46 | TTGACAGCTAGCTCAGTCCTAGG                                             |                                                                          |
| P47 | AACCCCGTTCGATATTTTGTG                                               | To identify pXMJ19-MAD7-TTTA (+)                                         |
| P48 | TTTCTCTTTGCGCTTGCGCACATTTCCCCG<br>AAAAGTGC                          | To clone pBluescript-MAD7-TTTA (+)                                       |
| P49 | GACTGAGCTAGCTGTCAACTGTCAGACCA<br>AGTTTACTCATATATAC                  |                                                                          |
| P50 | GTAACAGGATTAGCAGAGCGA                                               | To identify pBluescript-MAD7-TTTA (+)                                    |
| P51 | GTAGAACAAAGCAGGCAAGAATTTAAAT<br>AAAACGAAAGGCTCAGTCG                 | To clone pJYS1-MAD7-TTTA (-) / TTTC (+) / TTTC (-) / TTTT (-) / TTTG (-) |
| P52 | CTAGGACTGAGCTAGCTGTCAACAGCCTG<br>GCGGTGTAATGCACC                    |                                                                          |
| P53 | ATGGGATACCGGACCTTCTCTAGCGCTCA<br>AATAAAACGAAAGGC                    | To clone pJYS1-MAD7-CTTT                                                 |
| P54 | AGGTCCGGTATCCCATCGATCTACAAGAG<br>TAGAAATTAAAAAGGTCTTTTGACACTAG      |                                                                          |
| P55 | AGCCATCACGTGCTAAAAGCTAGCGCTCA<br>AATAAAACGAAAGGC                    | To clone pJYS1-MAD7-CTTG                                                 |
| P56 | TTAGCACGTGATGGCTGGATCTACAAGAG<br>TAGAAATTAAAAAGGTCTTTTGACACTAG      |                                                                          |
| P57 | GATGCATTGTGGGGGCGGGATCTACAAGA<br>GTAGAAATTAAAAAGGTCTTTTGACACTA<br>G | To clone pJYS1-MAD7-CTTA                                                 |
| P58 | CCCCACAATGCATCAACTAGCGCTCAAA<br>TAAAACGAAAGGC                       |                                                                          |
| P59 | CTGTCTTCCCGACCCACTACTCTAGCGCTC<br>AAATAAAACGAAAGGC                  | To clone pJYS1-MAD7-CTTC                                                 |
| P60 | TGGGTCGGGAAGACAGATCTACAAGAGT<br>AGAAATTAAAAAGGTCTTTTGACACTAG        |                                                                          |
| P61 | TACGGAAGGATCTGAGGTTCT                                               | To identify pJYS1-MAD7-YTTN                                              |
| P62 | AAAGGCTCAGTCGAAAGACTGGGCCTTTC<br>GTTTTATGGGTGTAGGAATACCCATGTGTT     | To amplify homology arm and crRNA for <i>ΔcrtEb</i>                      |
| P63 | GAGGACTACGGCTTTTCTGGCTCA                                            |                                                                          |
| P64 | CCAGAAAAGCCGTAGTCCTCTGCTTTTAT<br>CCGATCAGTTCTG                      |                                                                          |

|     |                                                                       |                                                      |
|-----|-----------------------------------------------------------------------|------------------------------------------------------|
| P65 | TAAGCAAGACGCCCAATTTTCG                                                |                                                      |
| P66 | TGCTGAATAAGCAATCACTCTAGCGCTCA<br>AATAAAACGAAAGGCTCAGTCGAAAGAC<br>TG   |                                                      |
| P67 | TGGGCGTCTTGCTTAAGAATTTAAATAAA<br>ACGAAAGGCTCAGTCG                     | To clone pJYS1-MAD7-TTTC-<br><i>ΔcrtEb</i>           |
| P68 | GAGTGATTGCTTATTCAGCACCATCTACA<br>AGAGTAGAAATTA AAAAAGGTCTTTTGACA<br>C |                                                      |
| P69 | CATTACAGATGCCAGTTGCTAGCGCTCAA<br>ATAAAACGAAAGGCTCAGTCGAAAGACT<br>G    | To clone pJYS1-MAD7-TTTG-<br><i>ΔcrtEb</i>           |
| P70 | CAACTGGCATCTGTAATGTTTCATCTACAA<br>GAGTAGAAATTA AAAAAGGTCTTTTGACAC     |                                                      |
| P71 | TGACACTCTCAGTGCTCTAGCGCTCAAAT<br>AAAACGAAAG                           | To clone pJYS1-MAD7-CTTT-<br><i>ΔcrtEb</i>           |
| P72 | AGCACTGAGAGTGTGAGCCATATCTACAA<br>GAGTAGAAATTA AAAAAGGTCTTTTGACAC      |                                                      |
| P73 | GCAGTACAGGATGTTAATGCTAGCGCTCA<br>AATAAAACGAAAGGCTCAGTCGAAAGAC<br>TG   | To clone pJYS1-MAD7-CTTG-<br><i>ΔcrtEb</i>           |
| P74 | CATTAACATCCTGTACTGCTCATCTACAA<br>GAGTAGAAATTA AAAAAGGTCTTTTGACAC      |                                                      |
| P75 | CGTATAACATCGCCATGTCTAGCGCTCAA<br>ATAAAACGAAAGGCTCAGTCGAAAGACT<br>G    | To clone pJYS1-MAD7-CTTA-<br><i>ΔcrtEb</i>           |
| P76 | ACATGGCGATGTTATACGGGAATCTACAA<br>GAGTAGAAATTA AAAAAGGTCTTTTGACAC      |                                                      |
| P77 | GTCTGCATTAACATCCTGCTAGCGCTCAA<br>ATAAAACGAAAGGCTCAGTCGAAAGACT<br>G    | To clone pJYS1-MAD7-CTTC-<br><i>ΔcrtEb</i>           |
| P78 | CAGGATGTTAATGCAGACCGGATCTACAA<br>GAGTAGAAATTA AAAAAGGTCTTTTGACAC      |                                                      |
| P79 | AAGTCATGGTTCAACCTCGG                                                  | To identify pJYS1-MAD7-<br>YTTN- <i>ΔcrtEb</i>       |
| P80 | TGCAGCAGCCAACGACCTCCTAGCGCTCA<br>AATAAAACGAAAGGCTCAGTCGAAAGAC<br>TG   | To amplify homology arm<br>and crRNA for <i>Δupp</i> |
| P81 | CGAAAGGCTCAGTCGAAAGACTGGGCCTT<br>TCGTTTTATAAGCCCACTGTGTAAACCGC        |                                                      |
| P82 | TGCCCTTAGAACTTAGCTTCACATGTTAA<br>ATCATTGCCG                           |                                                      |

|      |                                                                     |                                              |
|------|---------------------------------------------------------------------|----------------------------------------------|
| P83  | GAAGCTAAGTTTCTAAGGGCATTACGGAA<br>AATTCTTGCCC                        |                                              |
| P84  | CCGAGACACTGACGGGATTCA                                               |                                              |
| P85  | CCGTCAGTGTCTCGGAGAATTTAAATAAA<br>ACGAAAGGCTCAGTCGAAAGAC             | To clone pJYS1-MAD7-TTTC-<br><i>Δupp</i>     |
| P86  | TCGTTGGCTGCTGCACGATCTACAAGAGT<br>AGAAATTAAAAAGGTCTTTTGACAC          |                                              |
| P87  | TCGATGGTGGCGGTAACATCTACAAGAGT<br>AGAAATTAAAAAGGTCTTTTGACAC          | To clone pJYS1-MAD7-TTTG-<br><i>Δupp</i>     |
| P88  | TACCGCCACCATCGACCCACTAGCGCTCA<br>AATAAAACGAAAGGCTCAGTCGAAAGAC<br>TG |                                              |
| P89  | TCGTTGGCTGCTGCACGGATCTACAAGAG<br>TAGAAATTAAAAAGGTCTTTTGACAC         | To clone pJYS1-MAD7-CTTT-<br><i>Δupp</i>     |
| P90  | TGCAGCAGCCAACGACCTCTAGCGCTCAA<br>ATAAAACGAAAGGCTCAGTCGAAAGACT<br>G  |                                              |
| P91  | CCGGTGATCGTCTCTCTAGCGCTCAAATA<br>AAACGAAAGGCTCAGTCGAAAGACTG         | To clone pJYS1-MAD7-CTTG-<br><i>Δupp</i>     |
| P92  | AGAGACGATCACCGGCATCTCATCTACAA<br>GAGTAGAAATTAAAAAGGTCTTTTGACAC      |                                              |
| P93  | TGGCAGCGCCTCAACTAGCGCTCAAATAA<br>AACGAAAGGCTCAGTCGAAAGACTG          | To clone pJYS1-MAD7-CTTA-<br><i>Δupp</i>     |
| P94  | TTGAGGCGCTGCCACAGGATCATCTACAA<br>GAGTAGAAATTAAAAAGGTCTTTTGACAC      |                                              |
| P95  | AGTACCTTCAGCCATGCTAGCGCTCAAAT<br>AAAACGAAAGGCTCAGTCGAAAGACTG        | To clone pJYS1-MAD7-CTTC-<br><i>Δupp</i>     |
| P96  | CATGGCTGAAGGTACTCGCCTATCTACAA<br>GAGTAGAAATTAAAAAGGTCTTTTGACAC      |                                              |
| P97  | CAACAACACCACCTCCTTGT                                                | To identify pJYS1-MAD7-<br>YTTN- <i>Δupp</i> |
| P98  | AGGCTCAGTCGAAAGACTGGGCCTTTCGT<br>TTTATGTCTCAATTTCTGGATTGAGCCTG      | To amplify Δ5 kb homology<br>arm and crRNA   |
| P99  | ACTCGCGGGCAATAACGTAGAGCGATAG<br>TCTGCGGG                            |                                              |
| P100 | TTATTGCCCGCGAGTCTGCTG                                               |                                              |
| P101 | GATTTGCTTTGCGGTATCCCAAC                                             |                                              |
| P102 | CACCCATGACCTCTCTAGCGCTCAAATAA<br>AACGAAAGGCTCAGTCGAAAGACTGGG        | To clone pJYS1-MAD7-TTTC-<br>Δ5 kb           |
| P103 | TACCGCAAAGCAAATCAGAATTTAAATA<br>AAACGAAAGGCTCAGTCG                  |                                              |

|      |                                                                     |                                        |
|------|---------------------------------------------------------------------|----------------------------------------|
| P104 | AGAGGTCATGGGTGTGTAGTAATCTACAA<br>GAGTAGAAATTAAAAAGGTCTTTTGACAC      |                                        |
| P105 | CAACTCACCGACAATGCCGAAA                                              | To identify pJYS1-MAD7-<br>TTTC-Δ5 kb  |
| P106 | CGGTCTGAATGGTGTTCATCGG                                              |                                        |
| P107 | TGGTCATGCACCACATTGATGAGCAC                                          | To amplify Δ 20kb homology<br>arm      |
| P108 | TTCGCCGATGCCGTAGATGAATGAGGTTT<br>TACCG                              |                                        |
| P109 | ATCTACGGCATCGGCGAAGGTCAAGATCA<br>GGGTTATTAACCATTTTCTGCGC            |                                        |
| P110 | ATTCGTCTCACTGATACTCGCGCCAA                                          |                                        |
| P111 | GGCTCAGTCGAAAGACTGGGCCTTTCGTT<br>TTATTGGTCATGCACCACATTGATGAGCA<br>C | To clone pJYS1-MAD7-TTTC-<br>Δ20 kb    |
| P112 | CGCGAGTATCAGTGAGACGAATAGAATTT<br>AAATAAAACGAAAGGCTCAGTCG            |                                        |
| P113 | GAAGAAGTACACGTTCTTGGTGAGTGC                                         | To identify pJYS1-MAD7-<br>TTTC-Δ20 kb |
| P114 | AATGACCAGATGCGACTGCCCAATA                                           |                                        |
| P115 | AGAGGTCATGGGTGTGTAGTAATCTACAA<br>GAGTAGAAATTAAAAAGGTCTTTTGACAC      | To clone pJYS1-Cpf1-TTTC-<br>Δ20 kb    |
| P116 | CGCGAGTATCAGTGAGACGAATAGAATTT<br>AAATAAAACGAAAGGCTCAGTCG            |                                        |
| P117 | TTAGCGGACTTGAAGTCCTTCTGCA                                           | To identify pJYS1-Cpf1-TTTC-<br>Δ20 kb |
| P118 | CCGACAAGAAGTTCTTCGCAAAGCT                                           |                                        |
| P119 | TCTCAGACATCAACAAACGCCCCA                                            | To amplify Δ25 kb homology<br>arm      |
| P120 | GCGGAATTGTGGGACACCGTATCTGTGTT<br>GGTCTCTATTATGCCGGA                 |                                        |
| P121 | ATACGGTGTCCCACAATTCCGC                                              |                                        |
| P122 | AAGCAATAGGATCTGTGTGCTGGT                                            |                                        |
| P123 | CACACAGATCCTATTGCTTAGAATTTAAA<br>TAAACGAAAGGCTCAGTCG                | To clone pJYS1-MAD7-TTTC-<br>Δ25 kb    |
| P124 | TTACTTCTTCAGCGATCTAGCGCTCAAATA<br>AAACGAAAGGCTCAGTCGAAAGACTGGG<br>C |                                        |
| P125 | GATAACTCACCGTTTGATCCGG                                              |                                        |

|      |                                                                                                                 |                                                                             |
|------|-----------------------------------------------------------------------------------------------------------------|-----------------------------------------------------------------------------|
| P126 | CTTTAATGATGGGGACATGCGC                                                                                          | To identify pJYS1-MAD7-TTTC- $\Delta$ 25 kb                                 |
| P127 | TAAGCAGTCCATTAGATTCTAGCGCTCAA<br>ATAAAACGAAAGGCTCAGTCGAAAGACT<br>GG                                             | To clone pJYS1-MAD7-TTTC- <i>crtE</i>                                       |
| P128 | TCTAATGGACTGCTTATGGATCTACAAGA<br>GTAGAAATTAAAAAGGTCTTTTGACACTA<br>G                                             |                                                                             |
| P129 | CTGAAGGGCCTCCTTTTTGTATCCG                                                                                       | To clone pEC-recT                                                           |
| P130 | AAGGAGGCCCTTCAGATGACTAAGCAAC<br>CACCAATCGCAAA                                                                   |                                                                             |
| P131 | CTGTTTGCGCGTCATAACTTC                                                                                           | To identify pEC-recT                                                        |
| P132 | ATGGACAATGGCATGACAATCAC                                                                                         | To amplify <i>crtE</i> sequence                                             |
| P133 | CTAAGATTTGCGGCTGGCTAGT                                                                                          |                                                                             |
| P134 | TGGGTGGCAGCAAGAAAAAGATTAACCA<br>TAAGCAGTCCATTAGATTGTGCCCAATCT<br>AG                                             | 59 bp, corresponding to the mutation of PAM (TTTC) on the <i>crtE</i> gene  |
| P135 | AAGGTCAAGGCGCGCGAAGATTTGATGG<br>GTGGCAGCAAGAAAAAGATTAACCATAA<br>GCAGTCCATTAGATTGTGCCCAATCTAGA<br>TGCTCTGGATCGCG | 100 bp, corresponding to the mutation of PAM (TTTC) on the <i>crtE</i> gene |
| P136 | TCGGCTGCGTCACCAAAAGTA                                                                                           | To amplify $\Delta$ <i>crtR</i> homology arm                                |
| P137 | CACTTTAATTAACGTAGATGGTCATAGTA<br>ATCACCTTTTTCTACAAAGTCAGATAAAG                                                  |                                                                             |
| P138 | ATGACCATCTACGTTAATTAAGTGTGCA<br>GAG                                                                             |                                                                             |
| P139 | AGTCAAAGCGCTGAAGACTTGT                                                                                          |                                                                             |
| P140 | TACTTTTGGTGACGCAGCCGAATAAAACG<br>AAAGGCCAGTCT                                                                   | To clone pJYS1-MAD7-TTTC- $\Delta$ <i>crtR</i>                              |
| P141 | ACAAGTCTTCAGCGCTTGACTAGAATTT<br>AAATAAAACGAAAG                                                                  |                                                                             |
| P142 | CAGCAGTGCGTTGCTCTTGCT                                                                                           | To identify pJYS1-MAD7-TTTC- $\Delta$ <i>crtR</i>                           |
| P143 | CAGTATCTCGAGCGAAGGCGA                                                                                           |                                                                             |
| P144 | AGTGATTGCTTATTCAGCACC                                                                                           | To clone pJYS1-MAD7-TTTC- $\Delta$ <i>crtEb</i> $\Delta$ <i>crtR</i>        |
| P145 | GCTGAATAAGCAATCACTGTCAAAAGAC<br>CTTTTAAATTCTACTCTTGATAGATCC                                                     |                                                                             |

|      |                                                               |                                                                                |
|------|---------------------------------------------------------------|--------------------------------------------------------------------------------|
| P146 | ACACATGGGTATTCCTACACCCATAAAAC<br>GAAAGGCCCAGTCTTTC            |                                                                                |
| P147 | CGAAATTGGGCGTCTTGCTTATCGGCTGC<br>GTCACCAAAAGTA                |                                                                                |
| P148 | TTAACCTTGCACCCCATATGC                                         |                                                                                |
| P149 | GCGCCATATACAACGATTGGGAA                                       | To identify pJYS1-MAD7-<br>TTTC- $\Delta crtEb\Delta crtR$                     |
| P150 | GAAAGGAGGCCCTTCAGATGGAC                                       | To clone pZ9- <i>crtE-crtB-crtI</i>                                            |
| P151 | CTGAAGGGCCTCCTTTCCTAAGATTTGCG<br>GCTGGCTAGT                   |                                                                                |
| P152 | CCAGCCGCAAATCTTAGGAAAGGAGGCC<br>CTTCAGATGACACACCAAAATTCGCCTCT |                                                                                |
| P153 | AGTTCCTACTCTCGCATCCTTAATGATCG<br>TATGAGGTC                    |                                                                                |
| P154 | GGATGCGAGAGTAGGGA ACT                                         |                                                                                |
| P155 | CTGAAGGGCCTCCTTCTTGTTATCCGC                                   |                                                                                |
| P156 | CTGCCGTTGATGATCAAAACA                                         |                                                                                |
| P157 | TTACATGCCGATACCAGTGCAG                                        | To identify pZ9- <i>crtE-crtB-crtI</i>                                         |
| P158 | GGTCTCCGTCAATAACATCGT                                         |                                                                                |
| P159 | CCAGCCGCAAATCTTAGGAAAGGAGGCC<br>CTTCAGATGTCTACTAGCATCACAAC    |                                                                                |
| P160 | GAATTTTGGTGTGTCATCTGAAGGGCCTCC<br>TTTCTCATAGCTGAGGCTGCTTCT    | To clone pZ9- <i>cg0722-crtB-crtI</i><br>and pZ9- <i>crtE-cg0722-crtB-crtI</i> |
| P161 | GAAAGGAGGCCCTTCAGATGACACACCA<br>AAATTCGCCTCT                  |                                                                                |
| P162 | TTGCCTTCATTGTCGCTTTTG                                         |                                                                                |
| P163 | ATTTTGGCAGTTGAGCAACCA                                         | To identify pZ9- <i>cg0722-crtB-crtI</i>                                       |
| P164 | TGCCTGCTTTGTTCTACGACAT                                        | To identify pZ9- <i>crtE-cg0722-crtB-crtI</i>                                  |
| P165 | GATATTCAAGACA ACTTCGGC                                        |                                                                                |
| P166 | TTGTTATCCGCTCACAATTCC                                         |                                                                                |
| P167 | TTGTGAGCGGATAACAAGAAAGGAGGCC<br>CTTCAGATGAGCAGTTTCGATGCC      | To clone pZ9- <i>idsA-idi-crtB-crtI</i>                                        |
| P168 | CTACATCCGACGTTTCGGTTG                                         |                                                                                |

|      |                                                                     |                                            |
|------|---------------------------------------------------------------------|--------------------------------------------|
| P169 | CAACCGAACGTCGGATGTAGGAAAGGAG<br>GCCCTTCAGATGACTACTGAGGTTGAACT<br>GG |                                            |
| P170 | CTGAAGGGCCTCCTTTCTTACTCTGCGTCA<br>AACGCTTCC                         |                                            |
| P171 | GAAATTTGTCGAGGTCAAGGT                                               | To identify pZ9- <i>idsA-idi-crtB-crtI</i> |
| P172 | GTGGAAAACGCGAAATGCAGAGG                                             |                                            |
| P173 | CTTTTAAGGAAGAGAGGCGAAT                                              |                                            |

**Table S3** Editing efficiency of large DNA fragment deletion in *C. glutamicum*.

|        | <b>crRNA</b>          | <b>PAM</b> | <b>Efficiency</b> |
|--------|-----------------------|------------|-------------------|
| Δ5 kb  | TACTACACACCCATGACCTCT | TTTC       | 15/15;14/15;12/15 |
| Δ20 kb | TACTACACACCCATGACCTCT | TTTC       | 7/8;9/13;11/14    |
| Δ25 kb | TACTACACACCCATGACCTCT | TTTC       | 2/4;3/9;2/3       |
